# Supplementary material for: Synergistic Interactions of Cannabidiol with Chemotherapeutic Drugs in MCF7 Cells: Mode of Interaction and Proteomics Analysis of Mechanisms
Source: MDPI journal article supplement (doi:10.3390/ijms221810103), 2021-09-18
Supplement: s1 [file s1]

# Synergistic interaction of cannabidiol with chemotherapeutic drugs in MCF7 cells: mode of interaction and proteomics analysis of mechanisms

Muhammad A. Alsherbiny <sup>1,2,\*</sup>, Deep J. Bhuyan <sup>1,\*</sup>, Mitchell N. Low<sup>1</sup>, Dennis Chang <sup>1</sup> and Chun Guang Li <sup>1,\*</sup>

<sup>1</sup> NICM Health Research Institute, Western Sydney University, Penrith NSW 2747, Australia; [D.Chang@westernsydney.edu.au](mailto:D.Chang@westernsydney.edu.au)

<sup>2</sup> Department of Pharmacognosy, Faculty of Pharmacy, Cairo University, Cairo 11562, Egypt

\* Correspondence: [Muhammad.alsherbiny@pharma.cu.edu.eg](mailto:Muhammad.alsherbiny@pharma.cu.edu.eg) (M.A.A); [D.Bhuyan@westernsydney.edu.au](mailto:D.Bhuyan@westernsydney.edu.au)/ [deepjyoti.bhuyan@uon.edu.au](mailto:deepjyoti.bhuyan@uon.edu.au) (D.J.B.); [c.li@westernsydney.edu.au](mailto:c.li@westernsydney.edu.au) (C.G.L.)

## Table of Contents

|                                                                                                                                                                                                     |   |
|-----------------------------------------------------------------------------------------------------------------------------------------------------------------------------------------------------|---|
| Table S1 IC <sub>50</sub> of cannabidiol chemotherapeutic combinations against MCF7 .....                                                                                                           | 2 |
| Table S2 Pearson and Spearman correlation coefficients and corresponding P values among different synergy metrics .....                                                                             | 4 |
| Table S3 Percentage of necrotic, apoptotic, and living MCF7 cells retrieved from Annexing V-7AAD flowcytometry apoptosis analysis among CBD chemotherapeutic combinations and mono treatments ..... | 6 |
| Figure S1 MCF7 cell percentage analysis in different treatment groups in triplicates. ....                                                                                                          | 7 |

**Table S1 IC50 of cannabidiol chemotherapeutic combinations against MCF7**

|        | GraphPad      |                | Compusyn          |       |      |
|--------|---------------|----------------|-------------------|-------|------|
|        | IC50 (µgml-1) | R <sup>2</sup> | Dm(IC50 (µgml-1)) | m     | r    |
| CBD    | 11.75±2.82    | 0.96±0.03      | 20.48             | 8.01  | 0.93 |
| CDOC19 | 5.34±1.32     | 0.92±0.09      | 0.17              | 1.01  | 1.00 |
| CDOC28 | 1.74±2.46     | 0.08±0.07      | 1.55              | 1.00  | 1.00 |
| CDOC37 | ~3.18±2.33    | 0.22±0.19      | 2.36              | 1.00  | 1.00 |
| CDOC46 | ~2.74±1.31    | 0.45±0.09      | 2.67              | 1.00  | 1.00 |
| CDOC55 | ~3.68±0.8     | 0.49±0.12      | 2.61              | 1.00  | 1.00 |
| CDOC64 | ~4.59±1.43    | 0.62±0.07      | 3.15              | 0.99  | 1.00 |
| CDOC73 | 6.86±3.18     | 0.71±0.11      | 4.48              | 0.99  | 1.00 |
| CDOC82 | 8.25±2.98     | 0.82±0.07      | 4.27              | 0.99  | 1.00 |
| CDOC91 | 11.74±3.09    | 0.91±0.06      | 5.73              | 1.48  | 0.93 |
| DOC    | 0.0011±0.0005 | 0.84±0.18      | 8.12 ?            | 1.65  | 0.93 |
| CBD    | 10.99±2.46    | 0.98±0         | 33.08             | 85.57 | 0.88 |
| CDOX19 | 2.48±0.55     | 0.93±0.04      | 0.22              | 47.63 | 0.67 |
| CDOX28 | 5.03±0.89     | 0.93±0.04      | 2.68              | 75.41 | 0.83 |
| CDOX37 | 6.78±1.72     | 0.98±0.02      | 5.08              | 75.52 | 0.83 |
| CDOX46 | 9.01±2.92     | 0.97±0.01      | 7.47              | 75.77 | 0.84 |
| CDOX55 | 7.87±1.53     | 0.99±0.01      | 13.70             | 85.08 | 0.88 |
| CDOX64 | 8.51±2.45     | 0.98±0.02      | 16.87             | 85.38 | 0.88 |
| CDOX73 | 8.49±2.78     | 0.99±0.02      | 20.11             | 85.44 | 0.88 |
| CDOX82 | 9.16±2.91     | 0.99±0.01      | 23.31             | 85.54 | 0.88 |
| CDOX91 | 10.87±3.6     | 0.99±0.01      | 26.55             | 85.58 | 0.88 |
| DOX    | 0.24±0.07     | 0.9±0.02       | 29.85 ?           | 85.56 | 0.88 |
| CBD    | 10.61±1.28    | 0.97±0.01      | 33.03             | 85.61 | 0.88 |
| CPTX19 | 8.19±4.06     | 0.67±0.18      | 0.16              | 1.01  | 1.00 |
| CPTX28 | ~2.53±2.04    | 0.19±0.01      | 1.76              | 1.00  | 1.00 |
| CPTX37 | ~3.41±2.2     | 0.32±0.05      | 2.14              | 1.00  | 1.00 |
| CPTX46 | ~3.73±1.96    | 0.56±0.04      | 2.60              | 1.00  | 1.00 |
| CPTX55 | 4.44±1.61     | 0.7±0.06       | 2.58              | 1.00  | 1.00 |
| CPTX64 | 6.72±2        | 0.78±0.04      | 2.80              | 1.00  | 1.00 |
| CPTX73 | 7.38±1.58     | 0.87±0.08      | 3.68              | 0.99  | 1.00 |
| CPTX82 | 7.9±1.77      | 0.94±0.03      | 4.48              | 0.99  | 1.00 |
| CPTX91 | 8.88±1.47     | 0.95±0.04      | 5.30              | 0.99  | 1.00 |
| PTX    | 0.0018±0.001  | 0.67±0.1       | 7.84 ?            | 0.99  | 1.00 |
| CBD    | 10.65±5.45    | 0.99±0         | 23.73             | 76.23 | 0.84 |
| CSN19  | 1.12±0.56     | 0.77±0.06      | 0.19              | 1.01  | 1.00 |
| CSN28  | 3.84±0.8      | 0.78±0.13      | 4.55              | 0.56  | 0.92 |
| CSN37  | 5.94±1.02     | 0.8±0.14       | 3.19              | 1.05  | 0.87 |
| CSN46  | 6.2±1.07      | 0.9±0.06       | 4.19              | 1.20  | 0.88 |
| CSN55  | 7.72±1.57     | 0.94±0.02      | 4.57              | 1.48  | 0.94 |
| CSN64  | 8.47±1.96     | 0.95±0.02      | 5.65              | 1.69  | 0.95 |

|        |               |           |         |       |      |
|--------|---------------|-----------|---------|-------|------|
| CSN73  | 8.6±2.26      | 0.97±0    | 6.42    | 1.78  | 0.96 |
| CSN82  | 8.99±2.84     | 0.97±0.01 | 13.56   | 48.32 | 0.67 |
| CSN91  | 10.88±3.42    | 0.99±0.01 | 15.47   | 48.45 | 0.67 |
| SN-38  | 0.04±0.02     | 0.94±0.04 | 21.40   | 76.28 | 0.84 |
| CBD    | 13.84±6.94    | 0.98±0.02 | 33.29   | 85.41 | 0.88 |
| CVIN19 | ~5.17         | 0.3       | 0.15    | 1.01  | 1.00 |
| CVIN28 | ~0.48±0.62    | 0.2±0.11  | 1.49    | 1.00  | 1.00 |
| CVIN37 | ~2.68±0.83    | 0.45±0.13 | 2.38    | 1.00  | 1.00 |
| CVIN46 | ~3.44±0.76    | 0.58±0.02 | 2.63    | 1.01  | 1.00 |
| CVIN55 | ~4.51±0.61    | 0.65±0.05 | 2.98    | 1.00  | 1.00 |
| CVIN64 | ~7.19±3.22    | 0.68±0.15 | 3.42    | 0.99  | 1.00 |
| CVIN73 | 7.38±3.19     | 0.76±0.09 | 4.50    | 0.99  | 1.00 |
| CVIN82 | 9.17±3.61     | 0.84±0.08 | 4.34    | 0.99  | 1.00 |
| CVIN91 | 10.95±2.9     | 0.94±0.01 | 5.59    | 0.99  | 1.00 |
| VIN    | 0.0096±0.0033 | 0.82±0.08 | 17.40 ? | 48.24 | 0.67 |

IC50= Concentration inhibiting 50% of MCF7 cells, R<sup>2</sup> or r = linear correlation coefficient representing goodness of fitting (where 1 is a perfect fit), m=kinetic order reflecting the shape of the fit curve in median effect equation, Dm= the Compusyn calculated IC<sub>50</sub>

**Table S2 Pearson and Spearman correlation coefficients and corresponding P values among different synergy metrics**

| Pearson correlation       |            |            |            |            |            |         |            |            |            |            |            |  |  |
|---------------------------|------------|------------|------------|------------|------------|---------|------------|------------|------------|------------|------------|--|--|
| Correlation coefficient r |            |            |            |            |            |         |            |            |            |            |            |  |  |
|                           | CI.at.IC50 | CI.at.IC75 | CI.at.IC97 | CI.at.IC90 | CI.at.IC95 | ZIP     | CSS        | S          | LOEWE      | BLISS      | HSA        |  |  |
| CI.at.IC50                | 1          |            |            |            |            |         |            |            |            |            |            |  |  |
| CI.at.IC75                | 0.71       | 1          |            |            |            |         |            |            |            |            |            |  |  |
| CI.at.IC97                | 0.34       | 0.9        | 1          |            |            |         |            |            |            |            |            |  |  |
| CI.at.IC90                | 0.39       | 0.93       | 1          | 1          |            |         |            |            |            |            |            |  |  |
| CI.at.IC95                | 0.34       | 0.9        | 1          | 1          | 1          |         |            |            |            |            |            |  |  |
| ZIP                       | -0.15      | -0.12      | -0.0029    | -0.041     | -0.014     | 1       |            |            |            |            |            |  |  |
| CSS                       | -0.034     | -0.18      | -0.19      | -0.2       | -0.19      | 0.86    | 1          |            |            |            |            |  |  |
| S                         | 0.23       | -0.0062    | -0.11      | -0.11      | -0.11      | 0.83    | 0.93       | 1          |            |            |            |  |  |
| LOEWE                     | -0.45      | -0.2       | 0.036      | -0.0011    | 0.032      | 0.52    | 0.5        | 0.29       | 1          |            |            |  |  |
| BLISS                     | -0.26      | -0.16      | -0.00097   | -0.039     | -0.0099    | 0.9     | 0.83       | 0.71       | 0.77       | 1          |            |  |  |
| HSA                       | -0.39      | -0.2       | 0.017      | -0.027     | 0.0087     | 0.82    | 0.72       | 0.56       | 0.86       | 0.98       | 1          |  |  |
| P values (Pearson)        |            |            |            |            |            |         |            |            |            |            |            |  |  |
|                           | CI.at.IC50 | CI.at.IC75 | CI.at.IC97 | CI.at.IC90 | CI.at.IC95 | ZIP     | CSS        | S          | LOEWE      | BLISS      | HSA        |  |  |
| CI.at.IC50                | 0          |            |            |            |            |         |            |            |            |            |            |  |  |
| CI.at.IC75                | 5.9e-08    | 0          |            |            |            |         |            |            |            |            |            |  |  |
| CI.at.IC97                | 0.021      | 3.7e-17    | 0          |            |            |         |            |            |            |            |            |  |  |
| CI.at.IC90                | 0.0078     | 8.7e-20    | 7.5e-49    | 0          |            |         |            |            |            |            |            |  |  |
| CI.at.IC95                | 0.021      | 2.6e-17    | 7.9e-72    | 9.8e-53    | 0          |         |            |            |            |            |            |  |  |
| ZIP                       | 0.33       | 0.45       | 0.98       | 0.79       | 0.93       | 0       |            |            |            |            |            |  |  |
| CSS                       | 0.82       | 0.23       | 0.22       | 0.18       | 0.2        | 6e-14   | 0          |            |            |            |            |  |  |
| S                         | 0.12       | 0.97       | 0.49       | 0.46       | 0.45       | 2.4e-12 | 1.4e-20    | 0          |            |            |            |  |  |
| LOEWE                     | 0.002      | 0.2        | 0.81       | 0.99       | 0.83       | 0.00027 | 0.00047    | 0.058      | 0          |            |            |  |  |
| BLISS                     | 0.08       | 0.3        | 0.99       | 0.8        | 0.95       | 5.2e-17 | 2.3e-12    | 4.2e-08    | 5.3e-10    | 0          |            |  |  |
| HSA                       | 0.0085     | 0.19       | 0.91       | 0.86       | 0.95       | 8.4e-12 | 2.3e-08    | 5.7e-05    | 2.2e-14    | 3.2e-30    | 0          |  |  |
| Spearman correlation      |            |            |            |            |            |         |            |            |            |            |            |  |  |
| Correlation coefficient r |            |            |            |            |            |         |            |            |            |            |            |  |  |
|                           | CSS        | S          | ZIP        | BLISS      | LOEWE      | HSA     | CI.at.IC50 | CI.at.IC75 | CI.at.IC90 | CI.at.IC95 | CI.at.IC97 |  |  |
| CSS                       | 1          |            |            |            |            |         |            |            |            |            |            |  |  |
| S                         | 0.9        | 1          |            |            |            |         |            |            |            |            |            |  |  |
| ZIP                       | 0.83       | 0.91       | 1          |            |            |         |            |            |            |            |            |  |  |
| BLISS                     | 0.85       | 0.93       | 0.99       | 1          |            |         |            |            |            |            |            |  |  |
| LOEWE                     | 0.42       | 0.5        | 0.55       | 0.56       | 1          |         |            |            |            |            |            |  |  |
| HSA                       | 0.69       | 0.8        | 0.9        | 0.92       | 0.78       | 1       |            |            |            |            |            |  |  |
| CI.at.IC50                | -0.13      | 0.073      | 0.081      | 0.05       | -0.27      | -0.065  | 1          |            |            |            |            |  |  |
| CI.at.IC75                | -0.16      | 0.021      | 0.014      | -0.0047    | -0.25      | -0.092  | 0.93       | 1          |            |            |            |  |  |
| CI.at.IC90                | -0.49      | -0.4       | -0.31      | -0.32      | 0.076      | -0.17   | 0.39       | 0.56       | 1          |            |            |  |  |

|                            |         |         |         |         |       |       |            |            |            |            |            |  |
|----------------------------|---------|---------|---------|---------|-------|-------|------------|------------|------------|------------|------------|--|
| CI.at.IC95                 | -0.41   | -0.36   | -0.19   | -0.19   | 0.34  | 0.047 | 0.081      | 0.21       | 0.86       | 1          |            |  |
| CI.at.IC97                 | -0.35   | -0.3    | -0.11   | -0.12   | 0.36  | 0.12  | 0.061      | 0.17       | 0.8        | 0.98       | 1          |  |
| <b>P values (Spearman)</b> |         |         |         |         |       |       |            |            |            |            |            |  |
|                            | CSS     | S       | ZIP     | BLISS   | LOEWE | HSA   | CI.at.IC50 | CI.at.IC75 | CI.at.IC90 | CI.at.IC95 | CI.at.IC97 |  |
| CSS                        | 0       |         |         |         |       |       |            |            |            |            |            |  |
| S                          | 2.4e-17 | 0       |         |         |       |       |            |            |            |            |            |  |
| ZIP                        | 1.4e-12 | 2.1e-18 | 0       |         |       |       |            |            |            |            |            |  |
| BLISS                      | 1.7e-13 | 6.6e-20 | 2.9e-35 | 0       |       |       |            |            |            |            |            |  |
| LOEWE                      | 0.0036  | 0.00052 | 0.00011 | 5.3e-05 | 0     |       |            |            |            |            |            |  |
| HSA                        | 1.2e-07 | 5.6e-11 | 3.7e-17 | 4e-19   | 3e-10 | 0     |            |            |            |            |            |  |
| CI.at.IC50                 | 0.4     | 0.63    | 0.6     | 0.74    | 0.071 | 0.67  | 0          |            |            |            |            |  |
| CI.at.IC75                 | 0.29    | 0.89    | 0.93    | 0.98    | 0.096 | 0.55  | 2.1e-20    | 0          |            |            |            |  |
| CI.at.IC90                 | 0.00064 | 0.006   | 0.037   | 0.035   | 0.62  | 0.27  | 0.0085     | 7e-05      | 0          |            |            |  |
| CI.at.IC95                 | 0.0052  | 0.016   | 0.21    | 0.21    | 0.024 | 0.76  | 0.6        | 0.16       | 2.6e-14    | 0          |            |  |
| CI.at.IC97                 | 0.017   | 0.049   | 0.46    | 0.44    | 0.014 | 0.45  | 0.69       | 0.25       | 3.2e-11    | 3.2e-34    | 0          |  |

**Table S3 Percentage of necrotic, apoptotic, and living MCF7 cells retrieved from Annexing V-7AAD flowcytometry apoptosis analysis among CBD chemotherapeutic combinations and mono treatments**

| <b>CBD combination with Docetaxel</b>   |                         |                         |                         |                          |
|-----------------------------------------|-------------------------|-------------------------|-------------------------|--------------------------|
|                                         | <b>Control</b>          | <b>CBD for CDOC</b>     | <b>DOC</b>              | <b>CDOC</b>              |
| % live cells                            | 92.66±0.17 <sup>a</sup> | 75.52±1.27 <sup>b</sup> | 71.64±0.6 <sup>c</sup>  | 51.39±0.34 <sup>d</sup>  |
| % Early apoptotic cells                 | 1.12±0.11 <sup>a</sup>  | 4.36±0.24 <sup>b</sup>  | 7.11±0.9 <sup>c</sup>   | 19.62±1.43 <sup>d</sup>  |
| % Late apoptotic                        | 4.81±0.26 <sup>a</sup>  | 15.78±1.45 <sup>b</sup> | 16.16±0.72 <sup>b</sup> | 20.51±1.02 <sup>c</sup>  |
| % Necrotic cells                        | 1.4±0.32 <sup>a</sup>   | 4.34±0.08 <sup>b</sup>  | 5.1±0.36 <sup>b</sup>   | 8.47±0.22 <sup>c</sup>   |
| % Total popototic cells                 | 5.94±0.17 <sup>a</sup>  | 20.14±1.34 <sup>b</sup> | 23.27±0.26 <sup>c</sup> | 40.14±0.56 <sup>d</sup>  |
| <b>CBD combination with Doxorubicin</b> |                         |                         |                         |                          |
|                                         | <b>Control</b>          | <b>CBD for CDOX</b>     | <b>DOX</b>              | <b>CDOX</b>              |
| % live cells                            | 92.66±0.17 <sup>a</sup> | 73.67±5.64 <sup>b</sup> | 42.92±0.74 <sup>c</sup> | 8.96±0.87 <sup>d</sup>   |
| % Early apoptotic cells                 | 1.12±0.11 <sup>a</sup>  | 8.03±1.86 <sup>a</sup>  | 8.93±2.18 <sup>a</sup>  | 20.36±6.51 <sup>b</sup>  |
| % Late apoptotic                        | 4.81±0.26 <sup>a</sup>  | 16.62±3.21 <sup>b</sup> | 18.08±7.68 <sup>c</sup> | 29.01±4.11 <sup>d</sup>  |
| % Necrotic cells                        | 1.4±0.32 <sup>a</sup>   | 1.69±0.57 <sup>a</sup>  | 30.06±9.47 <sup>b</sup> | 41.68±10.19 <sup>c</sup> |
| % total apoptotic cells                 | 5.94±0.17 <sup>a</sup>  | 24.65±5.07 <sup>b</sup> | 27.02±9.79 <sup>b</sup> | 49.37±10.62 <sup>c</sup> |
| <b>CBD combination with Paclitaxel</b>  |                         |                         |                         |                          |
|                                         | <b>Control</b>          | <b>CBD for CPTX</b>     | <b>PTX</b>              | <b>CPTX</b>              |
| % live cells                            | 92.66±0.17 <sup>a</sup> | 32.37±1.12 <sup>b</sup> | 89.86±0.5 <sup>c</sup>  | 23.35±0.66 <sup>d</sup>  |
| % Early apoptotic cells                 | 1.12±0.11 <sup>a</sup>  | 22.77±1.46 <sup>b</sup> | 3.5±0.07 <sup>c</sup>   | 26.69±0.89 <sup>d</sup>  |
| % Late apoptotic                        | 4.81±0.26 <sup>a</sup>  | 36.17±0.95 <sup>b</sup> | 5.84±0.44 <sup>a</sup>  | 38.84±1.16 <sup>c</sup>  |
| % Necrotic cells                        | 1.4±0.32 <sup>a</sup>   | 8.69±0.08 <sup>b</sup>  | 0.8±0.07 <sup>a</sup>   | 11.11±0.33 <sup>c</sup>  |
| % Total apoptotic cells                 | 5.94±0.17 <sup>a</sup>  | 58.94±1.1 <sup>b</sup>  | 9.34±0.51 <sup>c</sup>  | 65.53±0.52 <sup>d</sup>  |
| <b>CBD combination with SN-38</b>       |                         |                         |                         |                          |
|                                         | <b>Control</b>          | <b>CBD for CSN-38</b>   | <b>SN-38</b>            | <b>CSN-38</b>            |
| % live cells                            | 92.66±0.17 <sup>a</sup> | 78.74±0.71 <sup>b</sup> | 89.93±0.76 <sup>c</sup> | 60.9±3.57 <sup>d</sup>   |
| % Early apoptotic cells                 | 1.12±0.11 <sup>a</sup>  | 3.46±0.05 <sup>b</sup>  | 4.96±0.53 <sup>a</sup>  | 12.92±1.92 <sup>c</sup>  |
| % Late apoptotic                        | 4.81±0.26 <sup>a</sup>  | 11.93±0.32 <sup>b</sup> | 3.94±0.24 <sup>a</sup>  | 19.12±1.42 <sup>c</sup>  |
| % Necrotic cells                        | 1.4±0.32 <sup>a</sup>   | 5.88±0.38 <sup>b</sup>  | 1.16±0.07 <sup>a</sup>  | 7.06±0.63 <sup>b</sup>   |
| % Total apoptotic cells                 | 5.94±0.17 <sup>a</sup>  | 15.38±0.36 <sup>b</sup> | 8.9±0.77 <sup>a</sup>   | 32.04±3.21 <sup>c</sup>  |
| <b>CBD combination with Vinorelbine</b> |                         |                         |                         |                          |
|                                         | <b>Control</b>          | <b>CBD for CVIN</b>     | <b>VIN</b>              | <b>CVIN</b>              |
| % live cells                            | 92.66±0.17 <sup>a</sup> | 71.31±0.6 <sup>b</sup>  | 62.98±0.59 <sup>c</sup> | 55.47±0.73 <sup>d</sup>  |
| % Early apoptotic cells                 | 1.12±0.11 <sup>b</sup>  | 7.49±0.36 <sup>b</sup>  | 8.32±0.25 <sup>b</sup>  | 30.14±0.73 <sup>c</sup>  |
| % Late apoptotic                        | 4.81±0.26 <sup>a</sup>  | 15.14±0.31 <sup>b</sup> | 16.61±0.15 <sup>c</sup> | 10.83±0.54 <sup>d</sup>  |
| % Necrotic cells                        | 1.4±0.32 <sup>a</sup>   | 6.05±0.56 <sup>b</sup>  | 12.1±0.64 <sup>c</sup>  | 3.56±0.12 <sup>d</sup>   |
| % Total apoptotic cells                 | 5.94±0.17 <sup>a</sup>  | 22.63±0.45 <sup>b</sup> | 24.93±0.13 <sup>c</sup> | 40.96±0.72 <sup>d</sup>  |

Superscript letters indicate statistical significance derived from two-way ANOVA and Tukey's multiple comparisons where different letters within the same row are statistically significant with P < 0.05, n=3.

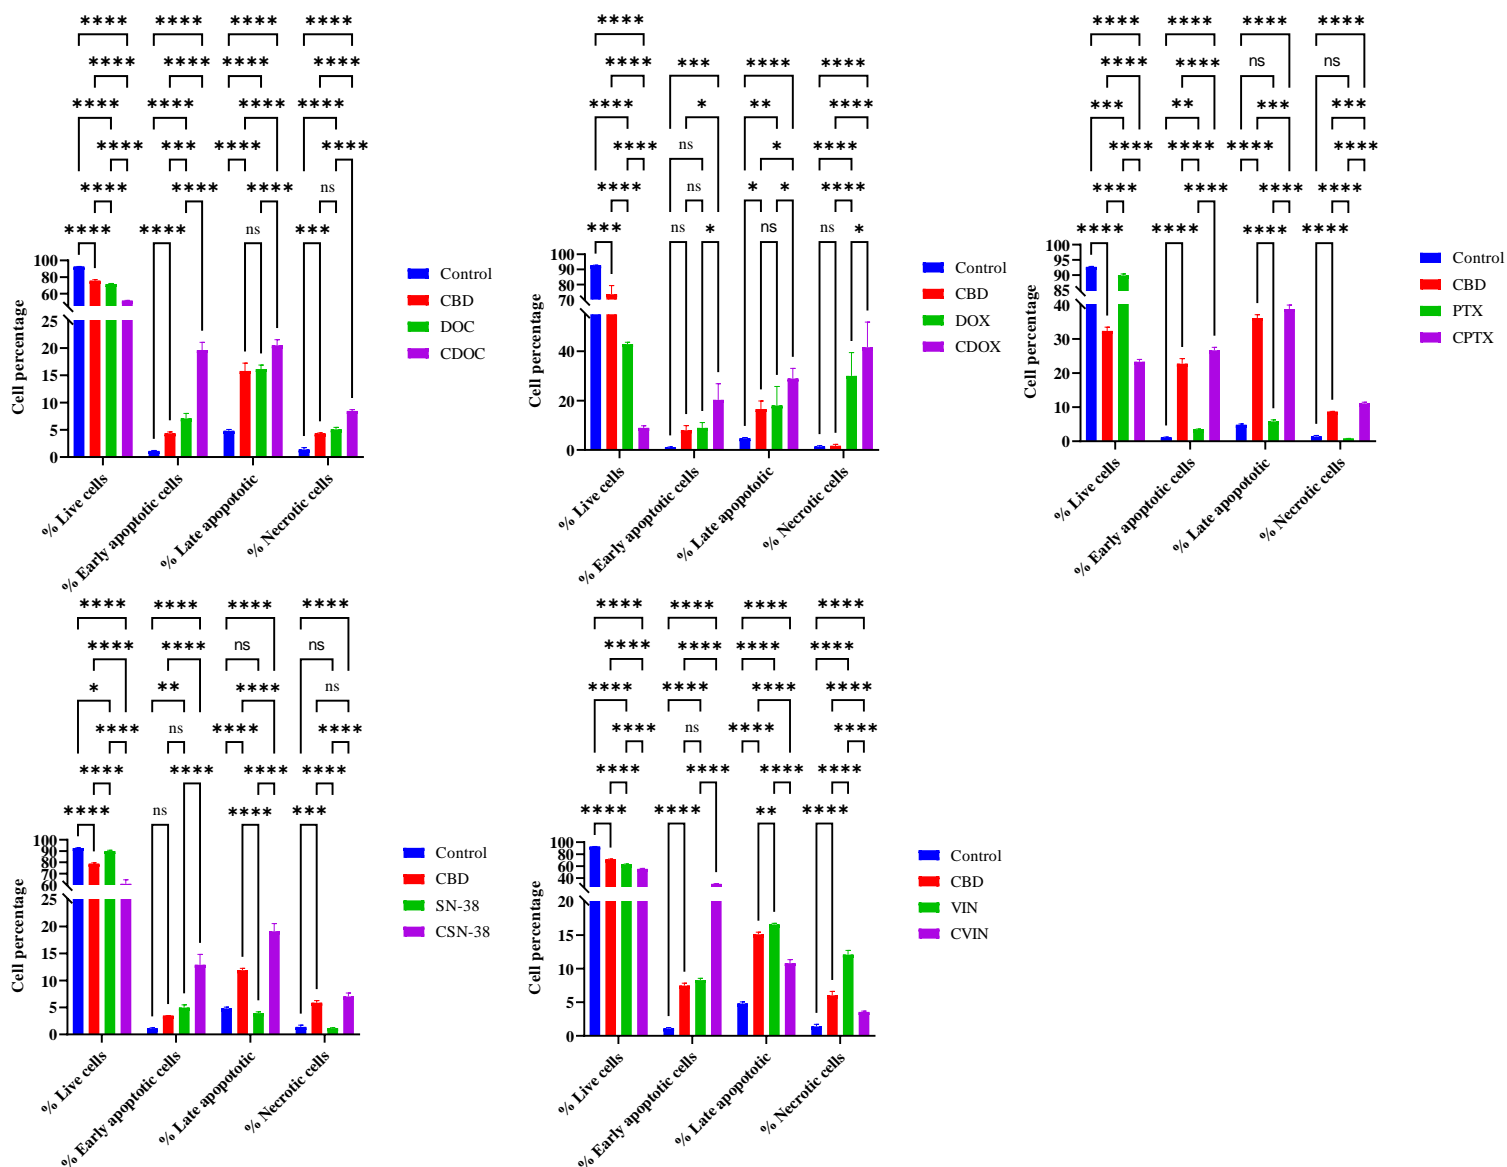

**Figure S1 MCF7 cell percentage analysis in different treatment groups in triplicates.**

Twenty-four hours of treatment of CBD chemotherapeutic combinations with a negative control were implemented using antibodies against Annexin-V CF-Blue and the reporter 7AAD. \*\*\*\*; significantly different as derived from Two-way ANOVA and Tukey's multiple comparisons at  $P < 0.0001$ , \*\*\*,  $P < 0.001$ , \*\*,  $P < 0.01$ , \*,  $P < 0.05$ , ns; non-significant.
